# Supplementary material for: ITO-free large area PDLC smart windows: a cost-effective fabrication using spray coated SnO2on an invisible Al mesh
Source: Royal Society of Chemistry journal article supplement (doi:10.1039/d1ta05820g), 2021-01-01
Supplement: d1ta05820g2.pdf [file d1ta05820g2.pdf]

## Supporting Information

### ITO-Free Large Area PDLC Smart Windows: A Cost-Effective Fabrication Using Spray Coated SnO<sub>2</sub> on Invisible Al Mesh

Indrajit Mondal<sup>a</sup>, S. Kiruthika<sup>a,b,†</sup>, Mukhesh K. Ganesha<sup>a,†</sup>, Marlin Baral<sup>a</sup>, Ankush Kumar<sup>c</sup>, S. Vimala<sup>a</sup>, P. Lakshmi Madhuri<sup>a</sup>, Geetha G. Nair<sup>a,\*</sup>, S. Krishna Prasad<sup>a,\*</sup>, Ashutosh K. Singh<sup>a</sup>, and Giridhar U. Kulkarni<sup>a,c\*</sup>

<sup>a</sup>Centre for Nano and Soft Matter Sciences, Bangalore-562162, India.

<sup>b</sup>Department of Physics, School of Electrical & Electronics Engineering (SEEE), SASTRA Deemed University, Thanjavur 613 401, Tamil Nadu, India.

<sup>c</sup>Chemistry & Physics of Materials Unit, Jawaharlal Nehru Centre for Advanced Scientific Research, Bangalore-560064, India.

\* Corresponding authors

E-mail addresses: Dr. S. Krishna Prasad ([skpras@gmail.com](mailto:skpras@gmail.com)), Prof. Giridhar U. Kulkarni ([gukulk@gmail.com](mailto:gukulk@gmail.com), [kulkarni@jncasr.ac.in](mailto:kulkarni@jncasr.ac.in)), Dr. Geetha G. Nair ([geeraj88@gmail.com](mailto:geeraj88@gmail.com))

| Component | Electrode (ITO: 2 no.) | NOA65    | E7 liquid crystal | Spacer |
|-----------|------------------------|----------|-------------------|--------|
| Price     | 40-50 \$               | 10-15 \$ | 10-15\$           | 1-2 \$ |

**Supporting Information Table S1.** Component wise price distribution for a 1 ft<sup>2</sup> ITO/PDLC/ITO device.

| Sl. No. | System                                        | PDLC             |                   |              | Gel              |                   |              |
|---------|-----------------------------------------------|------------------|-------------------|--------------|------------------|-------------------|--------------|
|         |                                               | $\tau_{ON}$ (ms) | $\tau_{OFF}$ (ms) | $V_{th}$ (V) | $\tau_{ON}$ (ms) | $\tau_{OFF}$ (ms) | $V_{th}$ (V) |
| 1       | ITO/ITO                                       | 44               | 80                | 1.42         | 16               | 37                | 0.8          |
| 2       | ITO/Au_SnO <sub>2</sub> mesh                  | 49               | 270               | 1.23         | 20               | 72                | 1.03         |
| 3       | Au_SnO <sub>2</sub> /Au_SnO <sub>2</sub> mesh | 62               | 170               | 1.28         | 20               | 144               | 1.02         |

$\tau_{ON}$  = Response time;  $\tau_{OFF}$  = Recovery time;  $V_{th}$  = Threshold voltage

**Supporting Information Table S2.** Hybrid mesh-based LC device comparison with the ITO-based standard device.

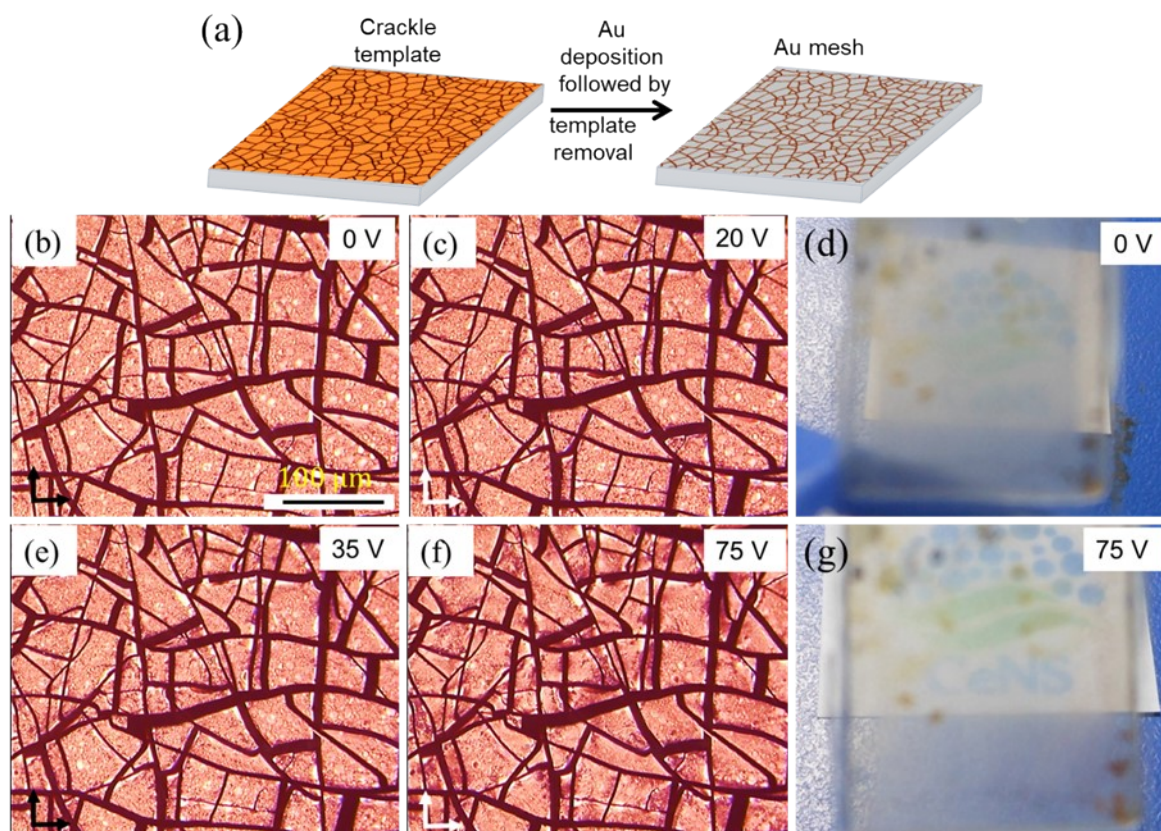

**Figure S1.** (a) Schematic representation of metal mesh fabrication by crackle lithography: coating crackle precursor and drying to form crackle template, and metal evaporation followed by template removal. Polarizing Optical microscopy images of a Au mesh/PDLC/Au mesh device at applied voltage of (b) 0 V, (c) 20 V, (e) 35 V and (f) 75 V (transmission mode). Digital photograph of the device at (d) OFF (0 V) and (g) ON (75 V) state.

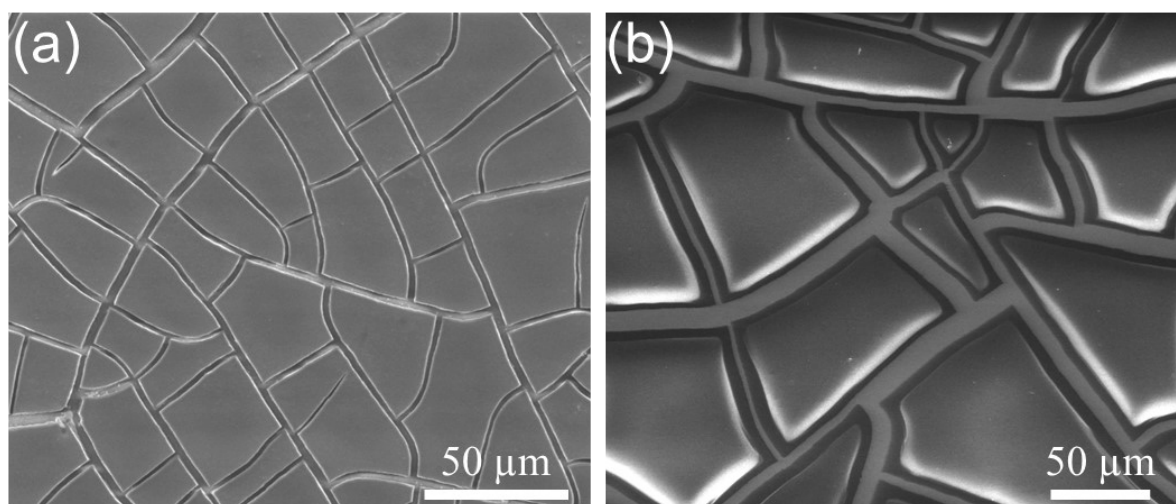

**Figure S2.** (a) FESEM image of the crackle template and (b) Au mesh. A charging effect is observed in the Au mesh image due to the presence of non-conducting regions between the mesh polygon.

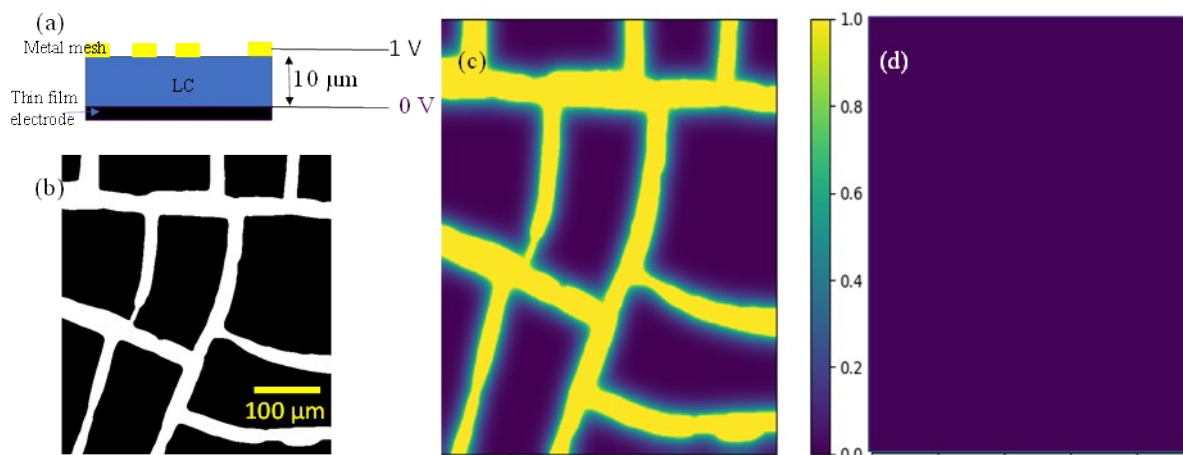

**Figure S3.** (a) 3-dimensional potential distribution modeling in the LC film of 10  $\mu\text{m}$  thickness sandwiched between the metal network and a conducting thin film counter electrode. (b) Binary image of a metal network. Potential distribution at the (c) surface of the metal network and (d) surface of the thin film electrode. The potential distribution modeling is performed by a self-written finite element method approach coded in python.

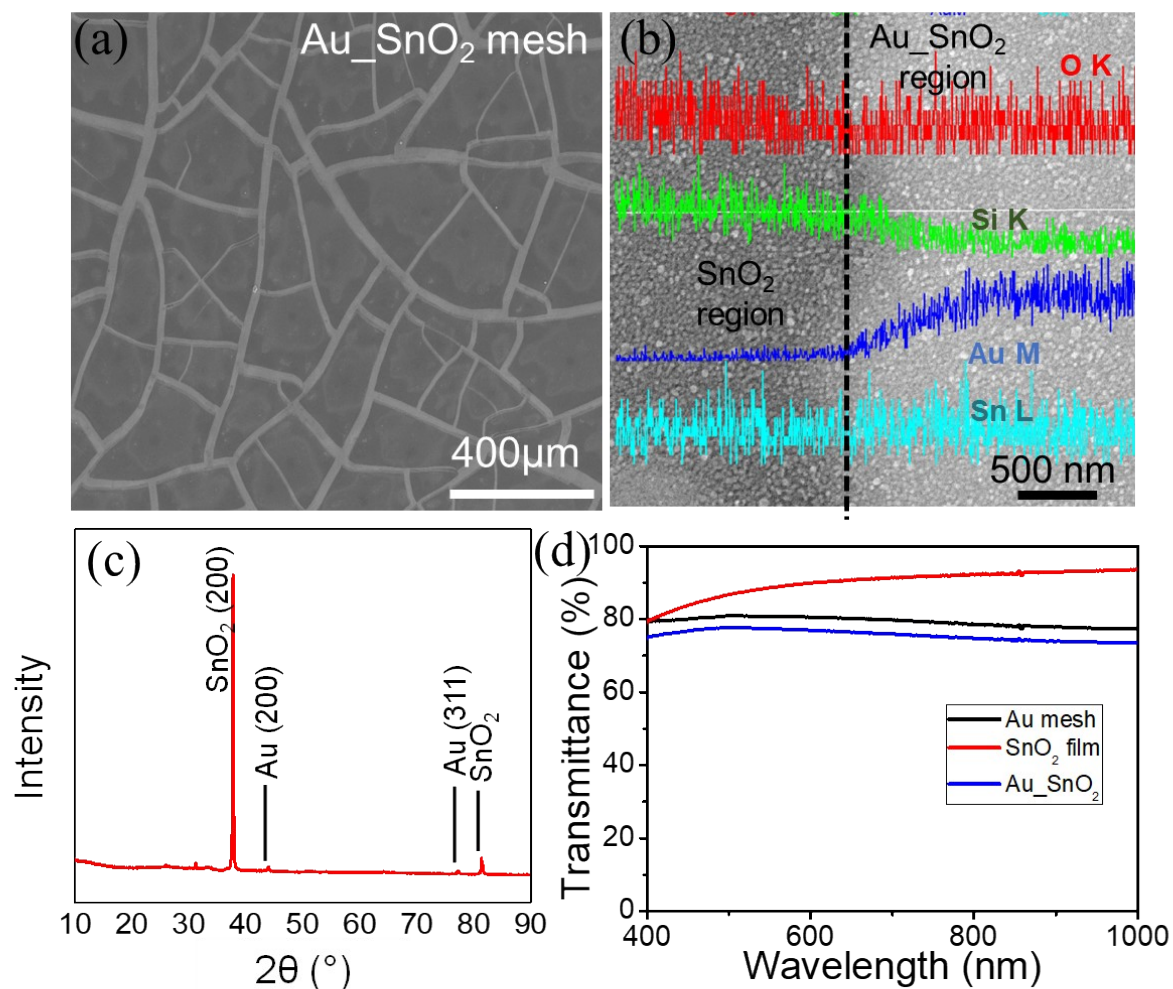

**Figure S4.** (a) low and (b) high magnification FESEM images of the hybrid TCE; the line mapping indicates the uniform coating of  $\text{SnO}_2$  film across the bare glass and Au mesh coated region. (c) XRD plot indicating the presence of peaks corresponding to both Au and  $\text{SnO}_2$ . (d) Transmission plot for Au mesh, pristine  $\text{SnO}_2$  film and the hybrid electrode.

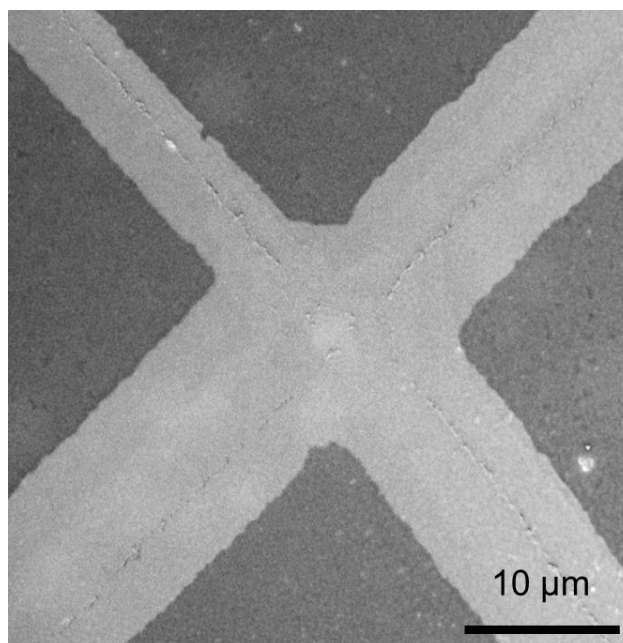

**Figure S5.** FESEM image showing a seamless junction of the Au mesh.

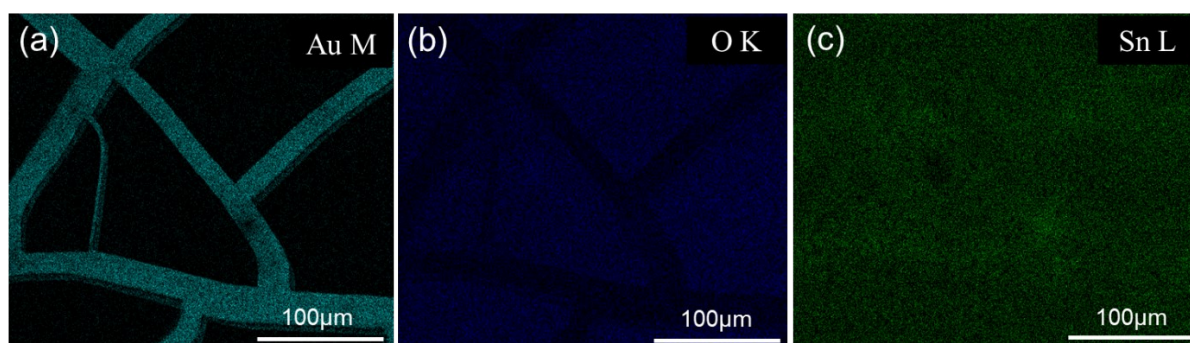

**Figure S6.** EDS mapping of (a) Au, (b) O and (c) Sn confirming the uniform coating of SnO<sub>2</sub> on Au mesh.

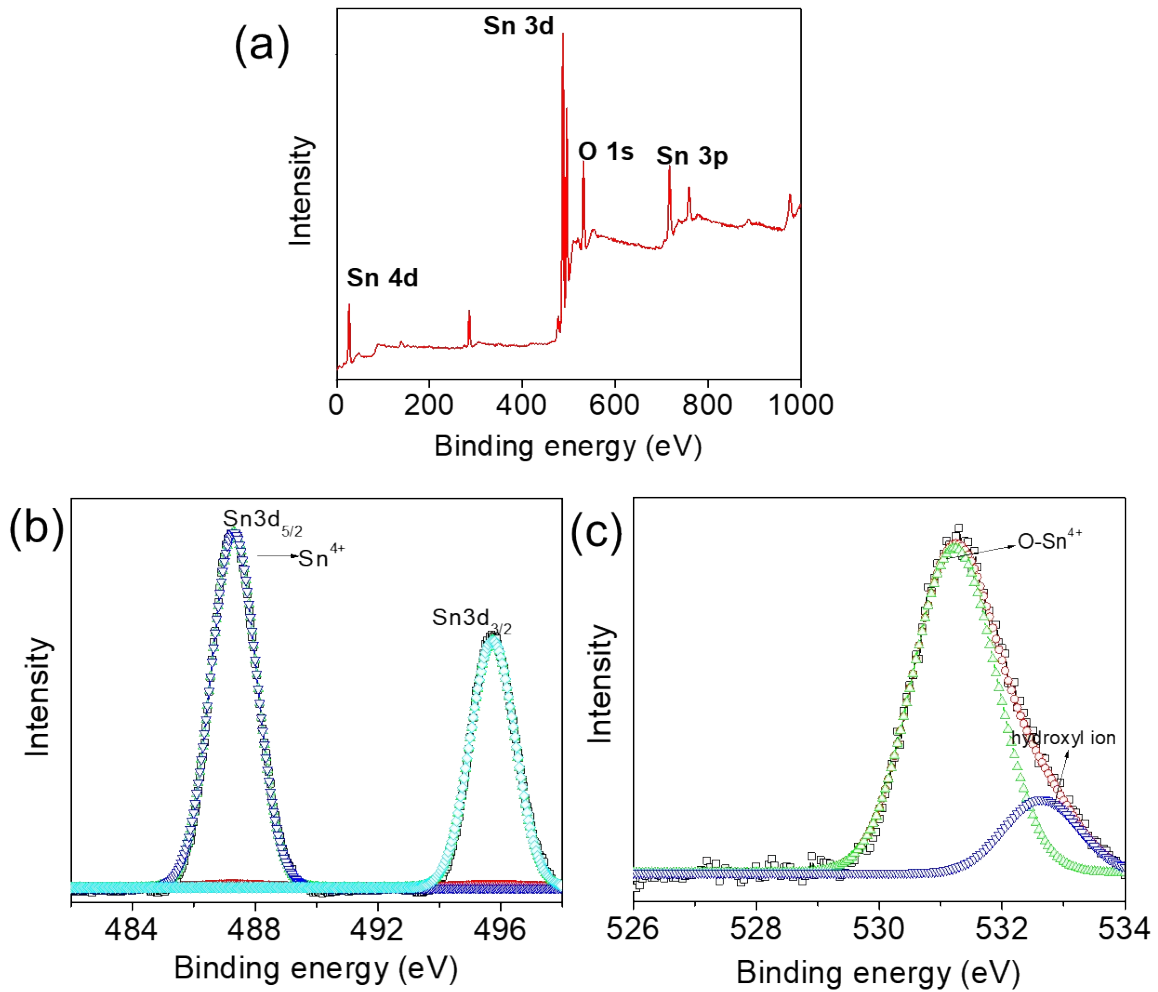

**Figure S7.** (a) X-ray photoelectron spectroscopic (XPS) measurement of SnO<sub>2</sub> film. High-resolution (b) Sn<sub>3d</sub> and (c) O<sub>1s</sub> XPS spectra of SnO<sub>2</sub>

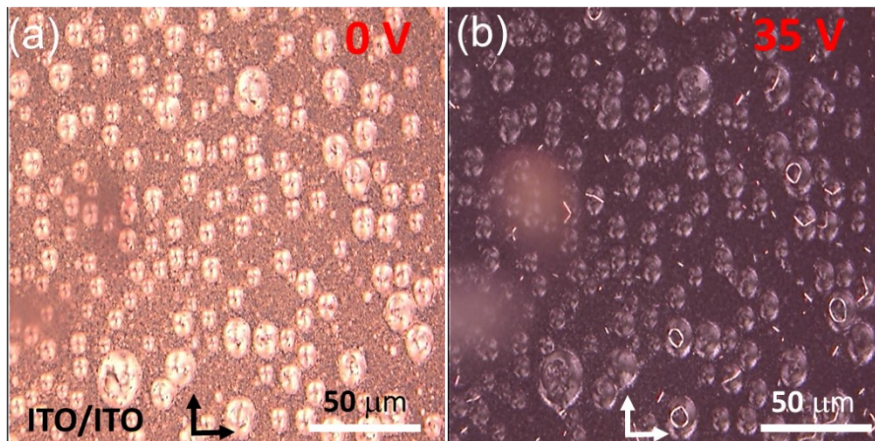

**Figure S8.** Polarizing optical microscopic images in (a) OFF and (b) ON state of a PDLC device fabricated using ITO electrodes. The clear contrast difference indicates a proper device switching. The arrow marks indicate the direction of the crossed polarisers.

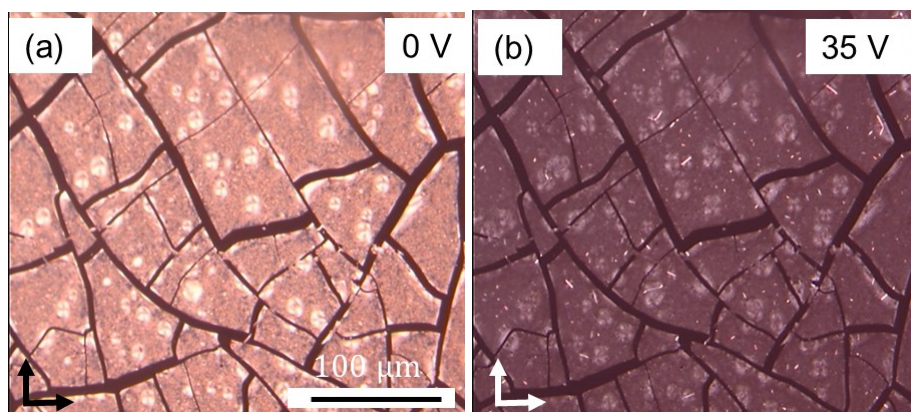

**Figure S9.** Polarizing optical microscopic images of ITO/PDLC/Au\_SnO<sub>2</sub> device in its (a) OFF and (b) ON state.

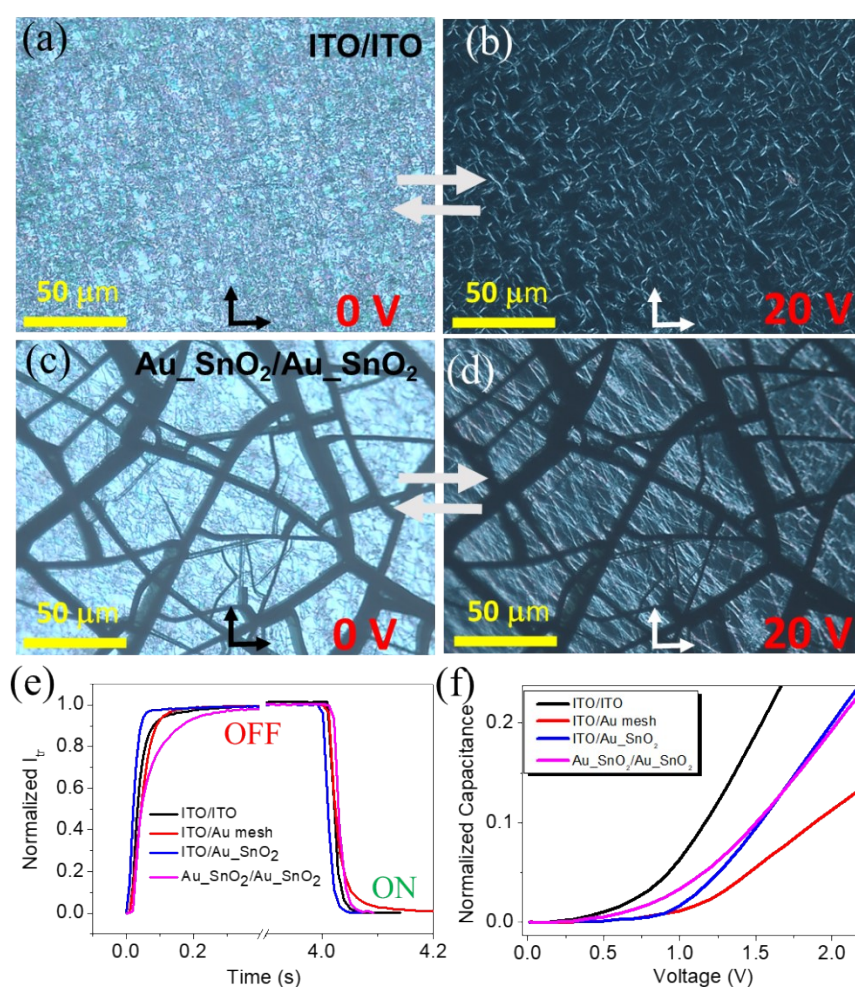

**Figure S10.** Polarizing optical microscopic images of Gel devices fabricated using (a)-(b) ITO/ITO and (c)-(d) Au\_SnO<sub>2</sub> /Au\_SnO<sub>2</sub> electrodes in their OFF and ON states. (e) Electro-optic response and recovery plots. (f) Fredericksz transformation behavior: normalized capacitance versus applied voltage profiles for various combinations of electrodes.

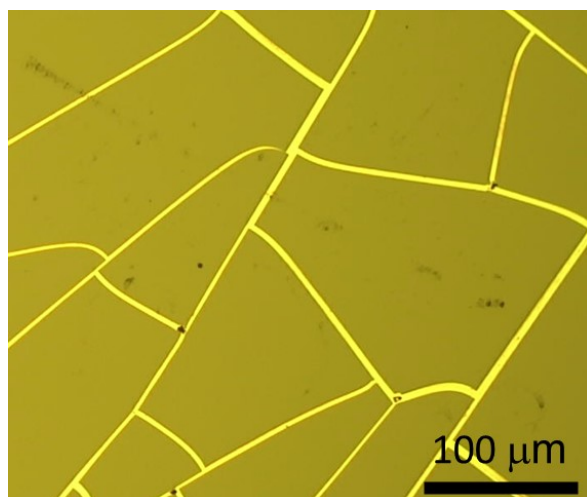

**Figure S11.** Optical microscopy image of an interconnected Al mesh electrode.

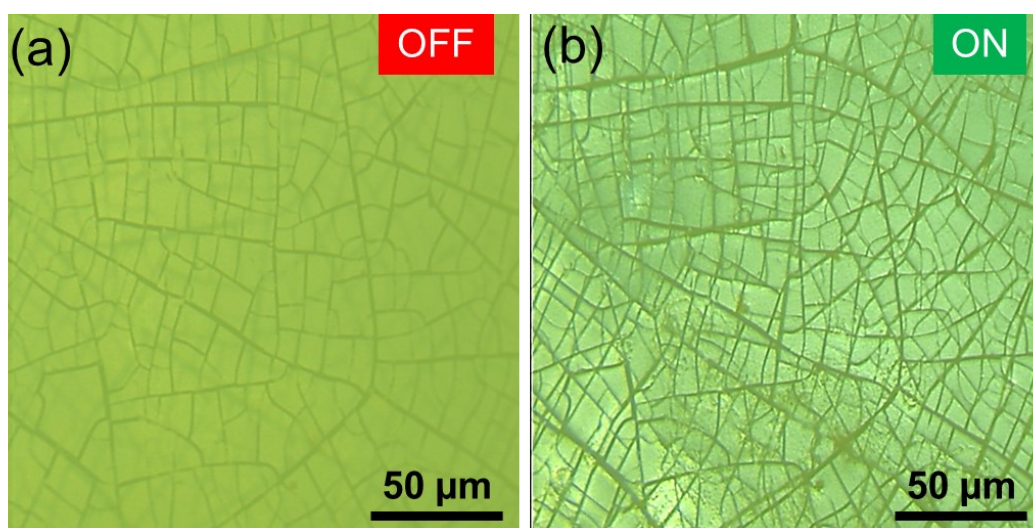

**Figure S12.** Optical microscopic images of Al<sub>2</sub>SnO<sub>2</sub>/PDLC/Al<sub>2</sub>SnO<sub>2</sub> device in its (a) OFF and (b) ON state. The bottom electrode mesh is also visible in the ON-state, representing the PDLC layer becoming transparent upon applying the electric field.

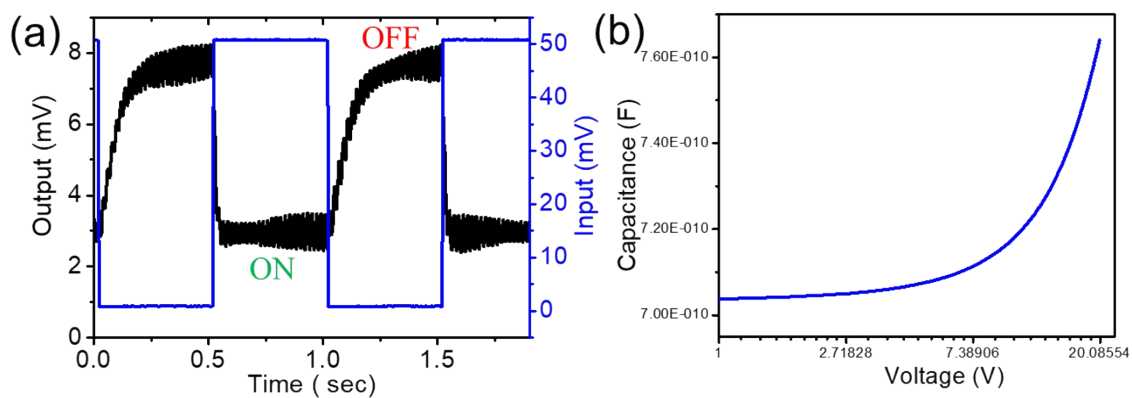

**Figure S13.** (a) Electro-optic response recovery of Al<sub>2</sub>SnO<sub>2</sub>/PDLC/Al<sub>2</sub>SnO<sub>2</sub> device and (b) Fredericksz transformation behavior.

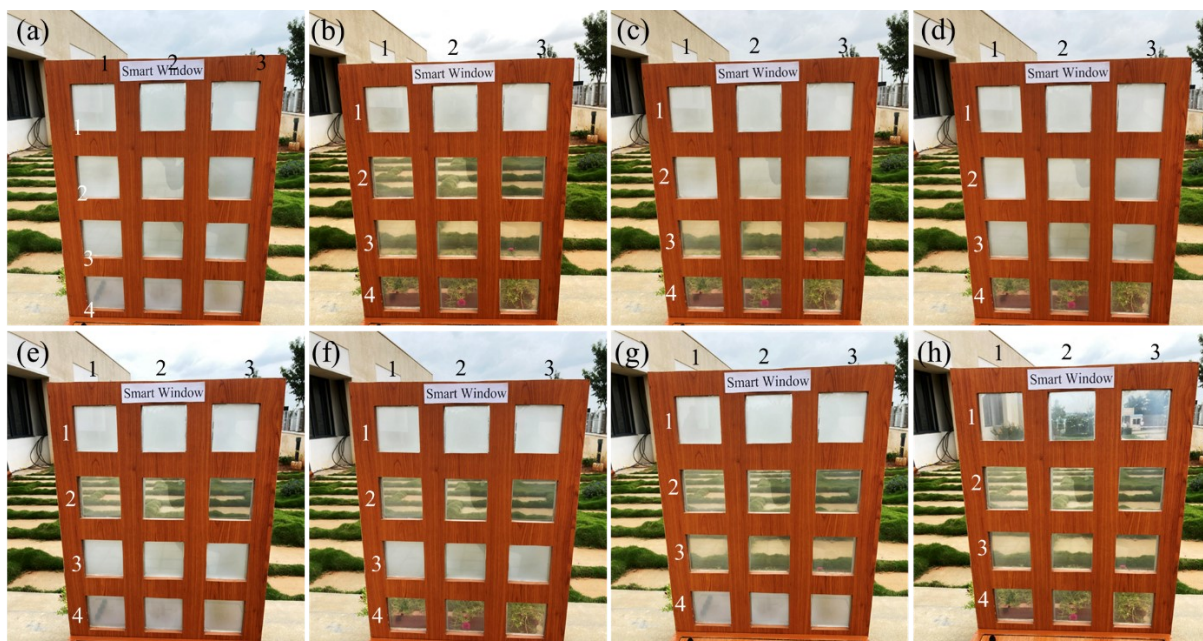

**Figure S14.** Photographs of a smart window-cum-display device (daylight view) in its fully opaque (a), partially transparent (b)-(g), and fully transparent states (h).

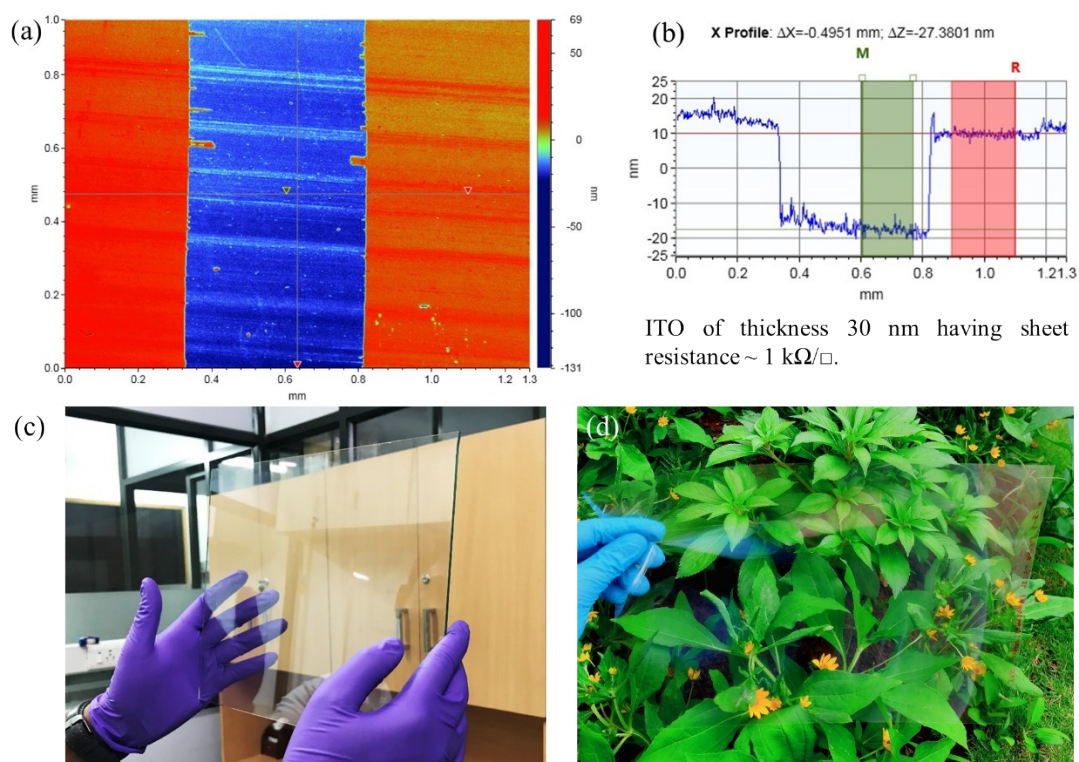

**Figure S15.** (a) Optical profilometry image of a ITO thin film and (b) the corresponding thickness profile. Large-area Al-ITO hybrid TCE on (c) glass and (d) flexible PET substrate.



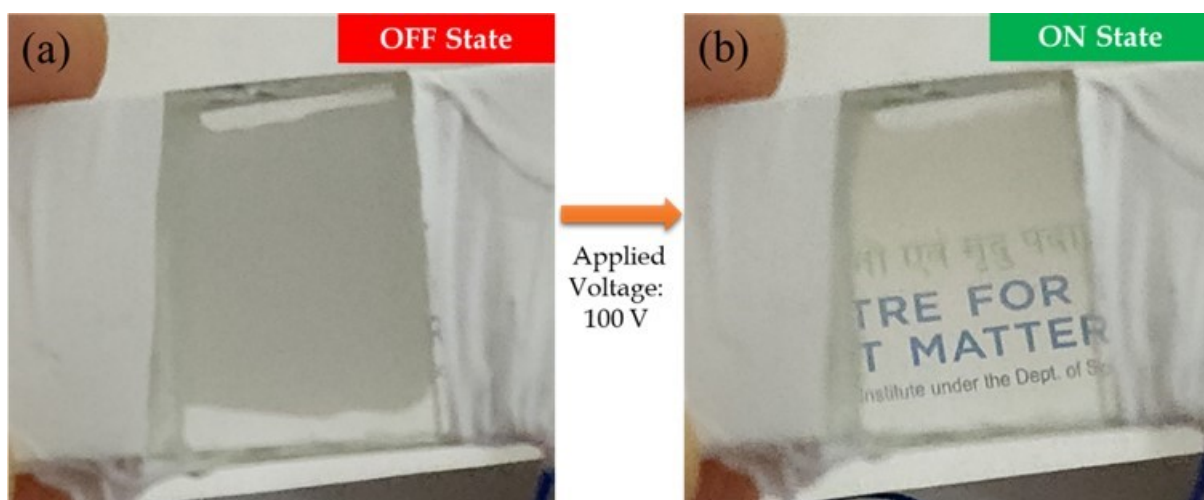

**Figure S16.** PDLC device made of Al\_ITO as the transparent electrodes in its (a) OFF and (b) ON state.

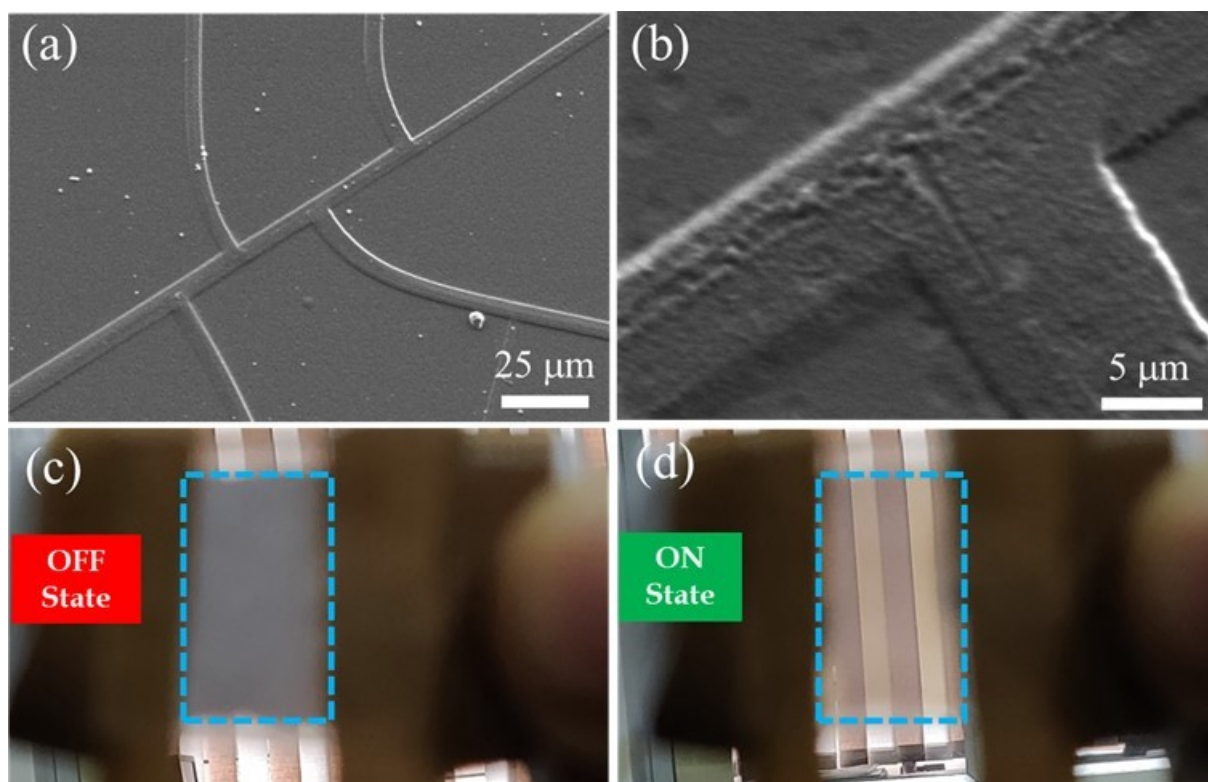

**Figure S17.** (a) Low and (b) high mag. FESEM images of PEDOT:PSS coated Al mesh electrode. A PDLC device comprised of the Al\_PEDOT:PSS hybrid electrodes in its (c) OFF and (d) ON states.
